# Supplementary material
Source: publisher figshare collection journal article supplement (https://sage.figshare.com/ndownloader/files/13058957)
Supplement: Supplementary file 1 [file 13058957]

## Sheet: Info
Calculations of the necessary parameters shown here are drawn from Nylund-Gibson et al. (2014)
Where table values from output (i.e., Average Latent Class Probabilities for Most Likely Latent Class Membership (Row) by Latent Class (Column)) are given as "0.000" enter as .0001 for sake of calculation on spreadsheet tabs (see Nylund-Gibson et al., 2014)
Minor differences may be expected to rounding, especially in the calculation of qc1,c2 coefficients
Nylund-Gibson, K., Grimm, R., Quirk, M., & Furlong, M. (2014). A latent transition mixture model using the three-step specification. Structural Equation Modeling, 21, 439-454. doi:10.1080/10705511.2014.915375
Select the spreadsheet tab that corresponds with the number of profiles in the optimal unconditional model.
Enter values into respective green-shaded cells only. Syntax will automatically populate in Column O.

## Sheet: Worked example
Logits for worked example
﻿Average Latent Class Probabilities for Most Likely Latent Class Membership (Row) by Latent Class (Column)														Mplus syntax generated, assuming the modal profile variable has been declared as "MODAL" in the VARIABLE command and that the latent class variable declared as "C"
														MODEL:
		1	2	3	4									%OVERALL%
	1	0.818	0.001	0.01	0.171
	2	0.0004	0.721	0.086	0.193									%C#1%
	3	0.004	0.137	0.78	0.08									[MODAL#1@1.4321];
	4	0.021	0.105	0.031	0.843									[MODAL#2@-4.3283];
														[MODAL#3@-3.1388];
Final Class Counts And Proportions For The Latent Classes Based On Their Most Likely Latent Class Membership														%C#2%
														[MODAL#1@-6.8842];
														[MODAL#2@1.5592];
	1	43												[MODAL#3@-1.2146];
	2	277
	3	91												%C#3%
	4	400												[MODAL#1@-3.3617];
														[MODAL#2@1.5592];
														[MODAL#3@1.7447];
Calculation of qc1,c2 coefficients based on Average Latent Class Probabilities and Final Class Counts
														%C#4%
	qc1,c2	1	2	3	4									[MODAL#1@-3.8256];
	1	0.798523	0.00251539	0.00826356	0.190698									[MODAL#2@-1.8417];
	2	0.00016914	0.785585	0.0490389	0.165207									[MODAL#3@-3.8355];
	3	0.00399509	0.221328	0.659469	0.115207
	4	0.0181424	0.131907	0.0179623	0.831989
Logits for the Classification Probabilities for the Most Likely Latent Class Membership (Column) by Latent Class (Row)
		1	2	3
	1	1.4321	-4.3283	-3.1388
	2	-6.8842	1.5592	-1.2146
	3	-3.3617	0.6529	1.7447
	4	-3.8256	-1.8417	-3.8355

## Sheet: 2-profile model
Logits calculations
﻿Average Latent Class Probabilities for Most Likely Latent Class Membership (Row) by Latent Class (Column)														Mplus syntax generated, assuming the modal profile variable has been declared as "MODAL" in the VARIABLE command and that the latent class variable declared as "C"
														MODEL:
		1	2											%OVERALL%
	1
	2													%C#1%
														[MODAL#1@];
														%C#2%
Final Class Counts And Proportions For The Latent Classes Based On Their Most Likely Latent Class Membership														[MODAL#1@];
	1
	2
Calculation of qc1,c2 coefficients based on Average Latent Class Probabilities and Final Class Counts
	qc1,c2	1	2
	1
	2
Logits for the Classification Probabilities for the Most Likely Latent Class Membership (Column) by Latent Class (Row)
		1
	1
	2

## Sheet: 3-profile model
Logits calculations
﻿Average Latent Class Probabilities for Most Likely Latent Class Membership (Row) by Latent Class (Column)														Mplus syntax generated, assuming the modal profile variable has been declared as "MODAL" in the VARIABLE command and that the latent class variable declared as "C"
														MODEL:
		1	2	3										%OVERALL%
	1
	2													%C#1%
	3													[MODAL#1@];
														[MODAL#2@];
														%C#2%
Final Class Counts And Proportions For The Latent Classes Based On Their Most Likely Latent Class Membership														[MODAL#1@];
														[MODAL#2@];
	1													%C#3%
	2													[MODAL#1@];
	3													[MODAL#2@];
Calculation of qc1,c2 coefficients based on Average Latent Class Probabilities and Final Class Counts
	qc1,c2	1	2	3
	1
	2
	3
Logits for the Classification Probabilities for the Most Likely Latent Class Membership (Column) by Latent Class (Row)
		1	2
	1
	2
	3

## Sheet: 4-profile model
Logits calculations
﻿Average Latent Class Probabilities for Most Likely Latent Class Membership (Row) by Latent Class (Column)														Mplus syntax generated, assuming the modal profile variable has been declared as "MODAL" in the VARIABLE command and that the latent class variable declared as "C"
														MODEL:
		1	2	3	4									%OVERALL%
	1
	2													%C#1%
	3													[MODAL#1@];
	4													[MODAL#2@];
														[MODAL#3@];
Final Class Counts And Proportions For The Latent Classes Based On Their Most Likely Latent Class Membership														%C#2%
														[MODAL#1@];
														[MODAL#2@];
	1													[MODAL#3@];
	2
	3													%C#3%
	4													[MODAL#1@];
														[MODAL#2@];
														[MODAL#3@];
Calculation of qc1,c2 coefficients based on Average Latent Class Probabilities and Final Class Counts
														%C#4%
	qc1,c2	1	2	3	4									[MODAL#1@];
	1													[MODAL#2@];
	2													[MODAL#3@];
	3
	4
Logits for the Classification Probabilities for the Most Likely Latent Class Membership (Column) by Latent Class (Row)
		1	2	3
	1
	2
	3
	4

## Sheet: 5-profile model
Logits calculations
﻿Average Latent Class Probabilities for Most Likely Latent Class Membership (Row) by Latent Class (Column)														Mplus syntax generated, assuming the modal profile variable has been declared as "MODAL" in the VARIABLE command and that the latent class variable declared as "C"
														MODEL:
		1	2	3	4	5								%OVERALL%
	1
	2													%C#1%
	3													[MODAL#1@];
	4													[MODAL#2@];
	5													[MODAL#3@];
														[MODAL#4@];
														%C#2%
Final Class Counts And Proportions For The Latent Classes Based On Their Most Likely Latent Class Membership														[MODAL#1@];
														[MODAL#2@];
	1													[MODAL#3@];
	2													[MODAL#4@];
	3
	4													%C#3%
	5													[MODAL#1@];
														[MODAL#2@];
														[MODAL#3@];
														[MODAL#4@];
Calculation of qc1,c2 coefficients based on Average Latent Class Probabilities and Final Class Counts
	qc1,c2	1	2	3	4	5								%C#4%
	1													[MODAL#1@];
	2													[MODAL#2@];
	3													[MODAL#3@];
	4													[MODAL#4@];
	5
														%C#5%
														[MODAL#1@];
														[MODAL#2@];
Logits for the Classification Probabilities for the Most Likely Latent Class Membership (Column) by Latent Class (Row)														[MODAL#3@];
		1	2	3	4									[MODAL#4@];
	1
	2
	3
	4
	5

## Sheet: 6-profile model
Logits calculations
﻿Average Latent Class Probabilities for Most Likely Latent Class Membership (Row) by Latent Class (Column)														Mplus syntax generated, assuming the modal profile variable has been declared as "MODAL" in the VARIABLE command and that the latent class variable declared as "C"
														MODEL:
		1	2	3	4	5	6							%OVERALL%
	1
	2													%C#1%
	3													[MODAL#1@];
	4													[MODAL#2@];
	5													[MODAL#3@];
	6													[MODAL#4@];
														[MODAL#5@];
														%C#2%
Final Class Counts And Proportions For The Latent Classes Based On Their Most Likely Latent Class Membership														[MODAL#1@];
														[MODAL#2@];
	1													[MODAL#3@];
	2													[MODAL#4@];
	3													[MODAL#5@];
	4
	5													%C#3%
	6													[MODAL#1@];
														[MODAL#2@];
														[MODAL#3@];
														[MODAL#4@];
Calculation of qc1,c2 coefficients based on Average Latent Class Probabilities and Final Class Counts														[MODAL#5@];
	qc1,c2	1	2	3	4	5	6
	1													%C#4%
	2													[MODAL#1@];
	3													[MODAL#2@];
	4													[MODAL#3@];
	5													[MODAL#4@];
	6													[MODAL#5@];
														%C#5%
														[MODAL#1@];
Logits for the Classification Probabilities for the Most Likely Latent Class Membership (Column) by Latent Class (Row)														[MODAL#2@];
		1	2	3	4	5								[MODAL#3@];
	1													[MODAL#4@];
	2													[MODAL#5@];
	3
	4													%C#6%
	5													[MODAL#1@];
	6													[MODAL#2@];
														[MODAL#3@];
														[MODAL#4@];
														[MODAL#5@];

## Sheet: 7-profile model
Logits calculations
﻿Average Latent Class Probabilities for Most Likely Latent Class Membership (Row) by Latent Class (Column)														Mplus syntax generated, assuming the modal profile variable has been declared as "MODAL" in the VARIABLE command and that the latent class variable declared as "C"
														MODEL:
		1	2	3	4	5	6	7						%OVERALL%
	1
	2													%C#1%
	3													[MODAL#1@];
	4													[MODAL#2@];
	5													[MODAL#3@];
	6													[MODAL#4@];
	7													[MODAL#5@];
														[MODAL#6@];
Final Class Counts And Proportions For The Latent Classes Based On Their Most Likely Latent Class Membership														%C#2%
														[MODAL#1@];
														[MODAL#2@];
	1													[MODAL#3@];
	2													[MODAL#4@];
	3													[MODAL#5@];
	4													[MODAL#6@];
	5
	6													%C#3%
	7													[MODAL#1@];
														[MODAL#2@];
														[MODAL#3@];
Calculation of qc1,c2 coefficients based on Average Latent Class Probabilities and Final Class Counts														[MODAL#4@];
														[MODAL#5@];
	qc1,c2	1	2	3	4	5	6	7						[MODAL#6@];
	1
	2													%C#4%
	3													[MODAL#1@];
	4													[MODAL#2@];
	5													[MODAL#3@];
	6													[MODAL#4@];
	7													[MODAL#5@];
														[MODAL#6@];
Logits for the Classification Probabilities for the Most Likely Latent Class Membership (Column) by Latent Class (Row)														%C#5%
														[MODAL#1@];
		1	2	3	4	5	6							[MODAL#2@];
	1													[MODAL#3@];
	2													[MODAL#4@];
	3													[MODAL#5@];
	4													[MODAL#6@];
	5
	6													%C#6%
	7													[MODAL#1@];
														[MODAL#2@];
														[MODAL#3@];
														[MODAL#4@];
														[MODAL#5@];
														[MODAL#6@];
														%C#7%
														[MODAL#1@];
														[MODAL#2@];
														[MODAL#3@];
														[MODAL#4@];
														[MODAL#5@];
														[MODAL#6@];
